# Supplementary material for: Electrodeposition immobilized molybdenum disulfide quantum dots and their electrochemiluminescence application in the detection of melamine residues in milk powder
Source: Royal Society of Chemistry journal article supplement (doi:10.1039/d1ay00364j), 2021-01-01
Supplement: d1ay00364j1.pdf [file d1ay00364j1.pdf]

## Supplementary information

# **Electrodeposition immobilized molybdenum disulfide quantum dots and its electrochemiluminescence application in the detection of melamine residue in milk powder**

Yousheng Ye<sup>a</sup>, Shasha Li<sup>a</sup>, An Ping<sup>a</sup>, Xinjun Wan<sup>a</sup>, Jianguo Li<sup>b,\*</sup>

<sup>a</sup> College of Chemistry and Material Engineering, Chaohu University, Chaohu 238000,  
P.R. China

<sup>b</sup> The Key Lab of Health Chemistry & Molecular Diagnosis of Suzhou, College of  
Chemistry, Chemical Engineering & Materials Science, Soochow University, Suzhou  
215123, P.R. China

Figure S1

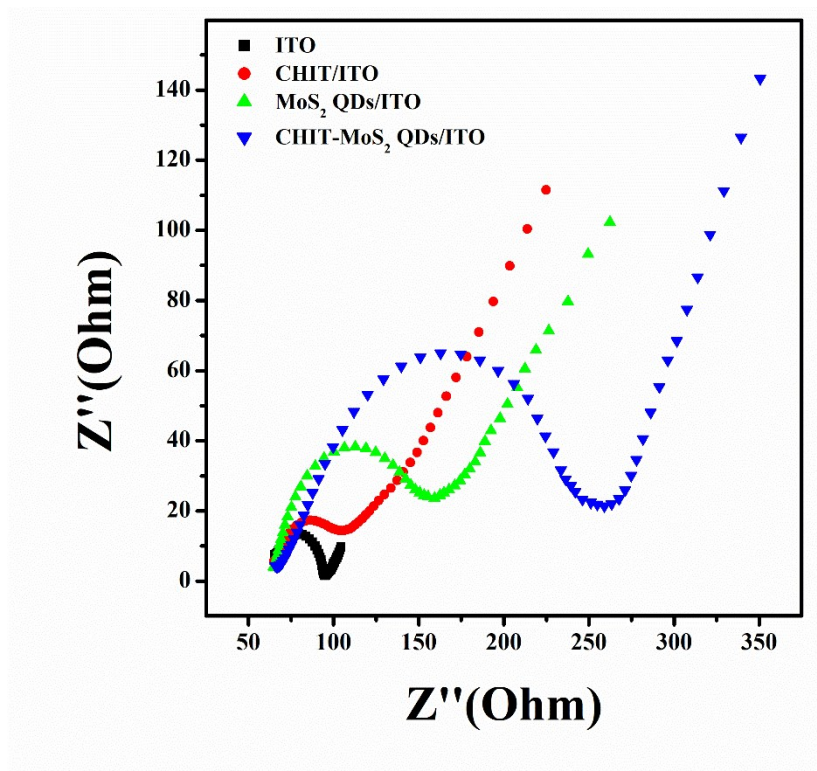

Figure S1. EIS of ITO, CHIT/ITO, MoS<sub>2</sub> QDs/ITO and CHIT-MoS<sub>2</sub> QDs /ITO.

**Figure S2**

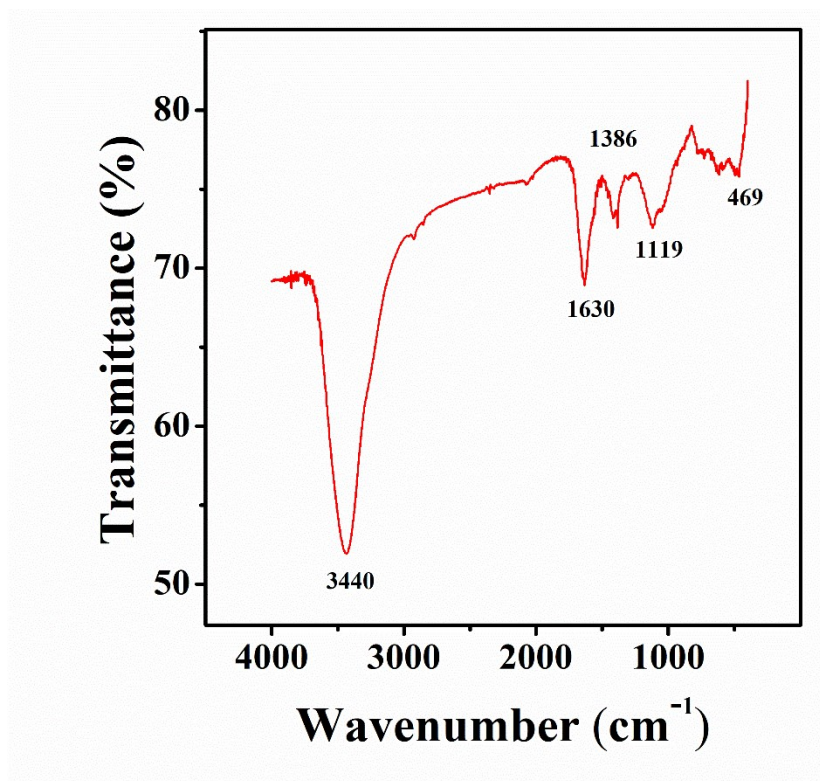

**Figure S2.** FT-IR spectrum of CHIT-MoS<sub>2</sub> QDs.
